# Supplementary material for: Functional link between mitochondria and Rnr3, the minor catalytic subunit of yeast ribonucleotide reductase
Source: PubMed Central journal article supplement (PMC6545439; doi:10.15698/mic2019.06.680), 2019-05-20
Supplement: mic-06-286-s01.pdf [file mic-06-286-s01.pdf]

**Table S1. Strains utilized in current study**

| Strain | Relevant Genotype                                                                                   | Source                 |
|--------|-----------------------------------------------------------------------------------------------------|------------------------|
| 4682   | WT ( <i>his3Δ1; leu2Δ0; met15Δ0; ura3Δ0</i> )                                                       | EUROSCARF              |
| 4683   | <i>RNR3-GFP::HIS3; his3Δ1; leu2Δ0; met15Δ0; ura3Δ0</i>                                              | EUROSCARF              |
| 835    | <i>RNR2-GFP::KanMX4; can1Δ; ade5Δ; leu2Δ; trp1Δ; ura3Δ</i>                                          |                        |
| 836    | <i>RNR4-GFP::KanMX4; can1Δ; ade5Δ; leu2Δ; trp1Δ; ura3Δ</i>                                          |                        |
| 4693   | <i>sml1Δ::KanMX4; RNR3-GFP::HIS3; his3Δ1; leu2Δ0; lys2Δ0; ura3Δ0</i>                                | This study             |
| 4751   | <i>MEC1::mec1-kd1; sml1::hphMX4; RNR3-GFP::HIS3; his3Δ1; met15Δ0; ura3Δ; leu2Δ0;</i>                | This study             |
| 4770   | <i>MEC1::mec1-4-URA3 RNR3-GFP::HIS3; his3Δ1; leu2Δ0; met15Δ0</i>                                    | This study             |
| 4514   | <i>rad53K277A-URA3 RNR3-GFP::HIS3 his3Δ1; leu2Δ0; met15Δ0; ura3Δ0</i>                               | This study             |
| 4713   | <i>dun1Δ::KanMX4; RNR3-GFP::HIS3; his3Δ1; leu2Δ0; lys2Δ0; ura3Δ0</i>                                | This study             |
| 4694   | <i>chk1Δ::KanMX4; RNR3-GFP::HIS3 his3Δ1; leu2Δ0; lys2Δ0; ura3Δ0 met15Δ0</i>                         | This study             |
| 4685   | <i>tel1Δ::KanMX4; RNR3-GFP::HIS3; his3Δ1; leu2Δ0; ura3Δ0</i>                                        | This study             |
| 4221   | <i>RAD53-GFP::HIS3; his3Δ1; leu2Δ0; met15Δ0; ura3Δ0</i>                                             | This study             |
| 4696   | <i>mrc1Δ::KanMX4; RNR3-GFP::HIS3; his3Δ1; leu2Δ0; lys2Δ0; ura3Δ0</i>                                | This study             |
| 4708   | <i>dif1Δ::KanMX4; RNR3-GFP::HIS3; his3Δ1; leu2Δ0; lys2Δ0; ura3Δ0</i>                                | This study             |
| 4699   | <i>irx1Δ::KanMX4; RNR3-GFP::HIS3; his3Δ1; leu2Δ0; lys2Δ0; ura3Δ0</i>                                | This study             |
| 4702   | <i>swi6Δ::KanMX4; RNR3-GFP::HIS3; his3Δ1; leu2Δ0; lys2Δ0; ura3Δ0</i>                                | This study             |
| 4688   | <i>mbp1Δ::KanMX4; RNR3-GFP::HIS3; his3Δ1; leu2Δ0; met15Δ0; ura3Δ0</i>                               | This study             |
| 4705   | <i>crt10Δ::KanMX4; RNR3-GFP::HIS3; his3Δ1; leu2Δ0; met15Δ0; ura3Δ0</i>                              | This study             |
| 4710   | <i>rfx1Δ::KanMX4; RNR3-GFP::HIS3; his3Δ1; leu2Δ0; met15Δ0; ura3Δ0</i>                               | This study             |
| 5345   | <i>atg1Δ::KanMX4 pGFP-ATG8 (LEU2) his3Δ1; leu2Δ0; met15Δ0; ura3Δ0</i>                               | This study             |
| 5351   | <i>atg16Δ::KanMX4 pGFP-ATG8 (LEU2) his3Δ1; leu2Δ0; met15Δ0; ura3Δ0</i>                              | This study             |
| 4788   | <i>rox1Δ::KanMX4; his3Δ1; leu2Δ0; lys2Δ0; ura3Δ0</i>                                                | EUROSCARF              |
| 4785   | <i>gut2Δ::KanMX4; his3Δ1; leu2Δ0; lys2Δ0; ura3Δ0</i>                                                | EUROSCARF              |
| 4781   | <i>ndi1Δ::KanMX4; his3Δ1; leu2Δ0; lys2Δ0; ura3Δ0</i>                                                | EUROSCARF              |
| 4787   | <i>tor1Δ::KanMX4; his3Δ1; leu2Δ0; lys2Δ0; ura3Δ0</i>                                                | EUROSCARF              |
| 5443   | <i>rox1Δ::kanMX4; RNR3-GFP::HIS3; his3Δ1; leu2Δ0; met15Δ0; ura3Δ0</i>                               | This study             |
| 5020   | <i>gut2Δ::KanMX4; RNR3-GFP::HIS3; his3Δ1; leu2Δ0; met15Δ0; ura3Δ0</i>                               | This study             |
| 5016   | <i>ndi1Δ::KanMX4 RNR3-GFP::HIS3 his3Δ1; leu2Δ0; met15Δ0; ura3Δ0</i>                                 | This study             |
| 5006   | <i>RNR1 CAN1 ade2-1 can1-100 his3-11,15 leu2-3,112 trp1-1 ura3-1 RAD5+</i>                          | Chabes A. et al., 2003 |
| 5007   | <i>rnr1-D57N CAN1 ade2-1 can1-100 his3-11,15 leu2-3,112 trp1-1 ura3-1 RAD5+</i>                     | Chabes A. et al., 2003 |
| 6374   | <i>rnr3Δ::hphMX4; can1Δ::STEpr-Sp_his5 lyp1Δ his3Δ1 leu2Δ0 ura3Δ0 met15Δ0</i>                       | This study             |
| 5338   | <i>pet127Δ::kanMX4; his3Δ1; leu2Δ0; met15Δ0; ura3Δ0</i>                                             | EUROSCARF              |
| 6378   | <i>rnr3Δ::hphMX4; pet127Δ::kanMX4; can1Δ::STEpr-Sp_his5; lyp1Δ; his3Δ1; leu2Δ0; ura3Δ0; met15Δ0</i> | This study             |
| 5337   | <i>tom6Δ::kanMX4; his3Δ1; leu2Δ0; met15Δ0; ura3Δ0</i>                                               | EUROSCARF              |
| 6380   | <i>rnr3Δ::hphMX4; tom6Δ::kanMX4; can1Δ::STEpr-Sp_his5; lyp1Δ; his3Δ1; leu2Δ0; ura3Δ0; met15Δ0</i>   | This study             |
| 4605   | <i>rnr1Δ::kanMX4; his3Δ1; leu2Δ0; met15Δ0; ura3Δ0</i>                                               | EUROSCARF              |
| 6566   | WT (4682) pRS315                                                                                    | This study             |
| 6567   | WT (4682) pRNR3                                                                                     | This study             |
| 6568   | WT (4682) pRNR3-C428A                                                                               | This study             |
| 6569   | <i>rnr3Δ::hphMX4 (6374) pRS315</i>                                                                  | This study             |
| 6570   | <i>rnr3Δ::hphMX4 (6374) pRNR3</i>                                                                   | This study             |
| 6571   | <i>rnr3Δ::hphMX4 (6374) pRNR3-C428A</i>                                                             | This study             |

**Table S2. Genetic interactors of *RNR3* [32].**

|        |        |           |
|--------|--------|-----------|
| apl3   | mrpl39 | tus1      |
| apl6   | mrpl9  | ubp3      |
| aps2   | mrx14  | ubr1      |
| arf3   | mtg1   | vam7      |
| arp2   | mum2   | vps20     |
| asc1   | nut1   | vps4      |
| atg34  | oca5   | vps62     |
| atg38  | ost4   | vps64     |
| brp1   | paa1   | YAR029W   |
| brr6   | pct1   | YBL036C   |
| bst1   | pet127 | YCR102C   |
| bub3   | pet18  | YDL086W   |
| bud21  | pex7   | YDL157C   |
| ccw14  | pho86  | YDR415C   |
| chk1   | pol30  | YEL020C   |
| cis1   | prm7   | YGR039W   |
| cog4   | psd1   | YHR050W-A |
| coq2   | rad14  | YMR209C   |
| coq4   | rad55  | ypc1      |
| crd1   | rax1   | YPR089W   |
| crs5   | rev1   |           |
| cyk3   | rgc1   |           |
| dal80  | rgi1   |           |
| dbp3   | rib2   |           |
| dig1   | rim20  |           |
| dld1   | rim21  |           |
| dml1   | rim9   |           |
| dse1   | rnp1   |           |
| ecm15  | rnr4   |           |
| eds1   | rny1   |           |
| elf1   | rog1   |           |
| env10  | rpd3   |           |
| erv2   | rpl21b |           |
| eug1   | rpl43a |           |
| fks1   | rpl6b  |           |
| frm2   | rpl9b  |           |
| gcd7   | rps6b  |           |
| gcv2   | rsm22  |           |
| gde1   | rtt103 |           |
| glt1   | sam1   |           |
| grx4   | scl1   |           |
| hda1   | sgf73  |           |
| hyp2   | smf3   |           |
| icp55  | snf1   |           |
| ino4   | spc105 |           |
| itc1   | spe3   |           |
| izh1   | srb6   |           |
| kap104 | ssp1   |           |
| kip3   | ste50  |           |
| lpd1   | swd1   |           |
| lre1   | sym1   |           |
| mdm36  | thi3   |           |
| mob2   | thi4   |           |
| mog1   | tom6   |           |
| mps1   | trp4   |           |

**Table S3. FunSpec (Functional Specificaion) analysis [39] of *RNR3* genetic interactors****GO Molecular Function**

| <b>Category</b>                                                           | <b>p-value</b> | <b>In Category from Cluster</b> | <b>k</b> | <b>f</b> |
|---------------------------------------------------------------------------|----------------|---------------------------------|----------|----------|
| glycine dehydrogenase (decarboxylating) activity [GO:0004375]             | 2.1E-03        | LPD1 GCV2                       | 2        | 4        |
| histone deacetylase activity (H3-K9 specific) [GO:0032129]                | 3.5E-03        | HDA1 RPD3                       | 2        | 5        |
| RNA polymerase II core binding [GO:0000993]                               | 3.5E-03        | RTT103 ELF1                     | 2        | 5        |
| histone deacetylase activity (H3-K14 specific) [GO:0031078]               | 3.5E-03        | HDA1 RPD3                       | 2        | 5        |
| histone deacetylase activity (H3-K16 specific) [GO:0034739]               | 3.5E-03        | HDA1 RPD3                       | 2        | 5        |
| carboxy-lyase activity [GO:0016831]                                       | 4.6E-03        | THI3 YEL020C PSD1               | 3        | 18       |
| NAD-dependent histone deacetylase activity (H4-K16 specific) [GO:0046970] | 5.2E-03        | HDA1 RPD3                       | 2        | 6        |
| NAD-dependent histone deacetylase activity (H3-K9 specific) [GO:0046969]  | 5.2E-03        | HDA1 RPD3                       | 2        | 6        |
| NAD-dependent histone deacetylase activity (H3-K14 specific) [GO:0032041] | 5.2E-03        | HDA1 RPD3                       | 2        | 6        |
| thiamine pyrophosphate binding [GO:0030976]                               | 9.5E-03        | THI3 YEL020C                    | 2        | 8        |

**GO Biological Process**

| <b>Category</b>                                                    | <b>p-value</b> | <b>In Category from Cluster</b>                                                                     | <b>k</b> | <b>f</b> |
|--------------------------------------------------------------------|----------------|-----------------------------------------------------------------------------------------------------|----------|----------|
| regulation of transcription by chromatin organization [GO:0034401] | 5.4E-04        | ELF1 HDA1 RPD3                                                                                      | 3        | 9        |
| protein transport [GO:0015031]                                     | 8.8E-04        | APL3 KAP104 CIS1 PEX7 VPS64<br>BST1 BRR6 VPS62 APL6 APS2<br>MOG1 VPS20 ATG34 TOM6 ARF3<br>COG4 VPS4 | 17       | 379      |
| leucine catabolic process [GO:0006552]                             | 1.1E-03        | THI3 LPD1                                                                                           | 2        | 3        |
| cellular lipid metabolic process [GO:0044255]                      | 1.3E-03        | IZH1 ROG1 BRR6                                                                                      | 3        | 12       |
| invasive growth in response to glucose limitation [GO:0001403]     | 2.1E-03        | SNF1 DSE1 ASC1 RIM21 RIM20                                                                          | 5        | 48       |
| intraluminal vesicle formation [GO:0070676]                        | 3.5E-03        | VPS20 VPS4                                                                                          | 2        | 5        |
| phospholipid biosynthetic process [GO:0008654]                     | 5.3E-03        | CRD1 PCT1 PSD1 INO4                                                                                 | 4        | 37       |
| sister chromatid biorientation [GO:0031134]                        | 7.2E-03        | MPS1 SPC105                                                                                         | 2        | 7        |
| mitotic cell cycle spindle assembly checkpoint [GO:0007094]        | 8.2E-03        | MPS1 SPC105 BUB3                                                                                    | 3        | 22       |

**GO Cellular Component**

| <b>Category</b>                       | <b>p-value</b> | <b>In Category from Cluster</b> | <b>k</b> | <b>f</b> |
|---------------------------------------|----------------|---------------------------------|----------|----------|
| AP-2 adaptor complex [GO:0030122]     | 2.1E-03        | APL3 APS2                       | 2        | 4        |
| glycine cleavage complex [GO:0005960] | 2.1E-03        | LPD1 GCV2                       | 2        | 4        |
| membrane coat [GO:0030117]            | 3.2E-03        | APL3 APL6 APS2                  | 3        | 16       |

**MIPS Functional Classification**

| <b>Category</b>                                                                       | <b>p-value</b> | <b>In Category from Cluster</b>       | <b>k</b> | <b>f</b> |
|---------------------------------------------------------------------------------------|----------------|---------------------------------------|----------|----------|
| secondary metabolism [01.20]                                                          | 1.3E-03        | YDL086W COQ4 COQ2                     | 3        | 12       |
| phospholipid metabolism [01.06.02.01]                                                 | 1.9E-03        | CRD1 BST1 PCT1 PSD1 INO4<br>GDE1      | 6        | 68       |
| regulation of the metabolism of vitamins, cofactors, and prosthetic groups [01.07.07] | 3.5E-03        | THI3 PAA1                             | 2        | 5        |
| biosynthesis of vitamins, cofactors, and prosthetic groups [01.07.01]                 | 5.1E-03        | THI3 COQ4 LPD1 THI4 COQ2 RIB2<br>SPE3 | 7        | 110      |
| degradation of glycine [01.01.09.01.02]                                               | 5.2E-03        | LPD1 GCV2                             | 2        | 6        |

**MIPS Protein Complexes**

| <b>Category</b> | <b>p-value</b> | <b>In Category from Cluster</b> | <b>k</b> | <b>f</b> |
|-----------------|----------------|---------------------------------|----------|----------|
|-----------------|----------------|---------------------------------|----------|----------|

|                                                                           |         |                  |   |    |
|---------------------------------------------------------------------------|---------|------------------|---|----|
| Complex Number 78, probably membrane biogenesis and traffic [550.1.78]    | 7.6E-04 | APL3 APL6 APS2   | 3 | 10 |
| AP-2 complex [260.20.20]                                                  | 2.1E-03 | APL3 APS2        | 2 | 4  |
| Glycine decarboxylase [200]                                               | 2.1E-03 | LPD1 GCV2        | 2 | 4  |
| Complex Number 292 [550.2.292]                                            | 3.5E-03 | ARP2 ICP55       | 2 | 5  |
| Complex Number 123, probably protein/RNA transport [550.1.123]            | 6.2E-03 | KAP104 SAM1 FKS1 | 3 | 20 |
| Complex Number 39, probably intermediate and energy metabolism [550.1.39] | 9.5E-03 | LPD1 SAM1        | 2 | 8  |

#### MIPS Protein Classes

| Category                                | p-value | In Category from Cluster | k | f |
|-----------------------------------------|---------|--------------------------|---|---|
| Ubiquitin-protein ligases (E3) [191.41] | 9.5E-03 | UBP3 UBR1                | 2 | 8 |

#### PFam-A Domains

| Category                                                                        | p-value | In Category from Cluster | k | f |
|---------------------------------------------------------------------------------|---------|--------------------------|---|---|
| <A<br>href='http://pfam.sanger.ac.uk/family?id=Hist_deacetyl'>Hist_deacetyl</A> | 3.5E-03 | HDA1 RPD3                | 2 | 5 |
| <A<br>href='http://pfam.sanger.ac.uk/family?id=TPP_enzyme_M'>TPP_enzyme_M</A>   | 7.2E-03 | THI3 YEL020C             | 2 | 7 |
| <A<br>href='http://pfam.sanger.ac.uk/family?id=TPP_enzyme_C'>TPP_enzyme_C</A>   | 7.2E-03 | THI3 YEL020C             | 2 | 7 |
| <A<br>href='http://pfam.sanger.ac.uk/family?id=TPP_enzyme_N'>TPP_enzyme_N</A>   | 7.2E-03 | THI3 YEL020C             | 2 | 7 |
| <A<br>href='http://pfam.sanger.ac.uk/family?id=Adaptin_N'>Adaptin_N</A>         | 9.5E-03 | APL3 APL6                | 2 | 8 |

#### MDS Proteomics Complexes

| Category       | p-value | In Category from Cluster | k | f |
|----------------|---------|--------------------------|---|---|
| YAR007C (RFA1) | 3.5E-03 | ARP2 ICP55               | 2 | 5 |

#### Cellzome Complexes

| Category       | p-value | In Category from Cluster | k | f  |
|----------------|---------|--------------------------|---|----|
| YBL037W (APL3) | 2.1E-03 | APL3 APS2                | 2 | 4  |
| YDR062W (LCB2) | 2.7E-03 | KAP104 SAM1 FKS1         | 3 | 15 |
| YDR148C (KGD2) | 7.2E-03 | LPD1 SAM1                | 2 | 7  |
